# Supplementary material
Source: PubMed Central journal article supplement (PMC7035491)
Supplement: pnas.1915450117.sapp.pdf [file pnas.1915450117.sapp.pdf]

# PNAS

www.pnas.org

## Supporting Information for

### High-throughput quantitative microscopy-based half-life measurements of intravenously injected agents

Laura G. Bracaglia<sup>a,1</sup>, Alexandra S. Piotrowski-Daspit<sup>a,1</sup>, Chun-Yu Lin<sup>a</sup>, Zoe M. Moscato<sup>a</sup>, Yongheng Wang<sup>a</sup>, Gregory T. Tietjen<sup>a,b</sup>, and W. Mark Saltzman<sup>a,c,d,2</sup>

<sup>a</sup>Department of Biomedical Engineering and <sup>c</sup>Department of Chemical & Environmental Engineering, Yale University, New Haven, CT 06511

<sup>b</sup>Department of Surgery, and <sup>d</sup>Department of Cellular & Molecular Physiology, Yale School of Medicine, New Haven, CT 06511

<sup>1</sup>These authors contributed equally to this work.

<sup>2</sup>Address correspondence to W.M.S.  
Malone Engineering Center 413  
55 Prospect Street  
New Haven, CT 06511  
Phone: (203) 432-3281  
Fax: (203) 432-0030  
E-mail: [mark.saltzman@yale.edu](mailto:mark.saltzman@yale.edu)

#### This PDF file includes:

Figures S1 to S4  
Tables S1 and S2

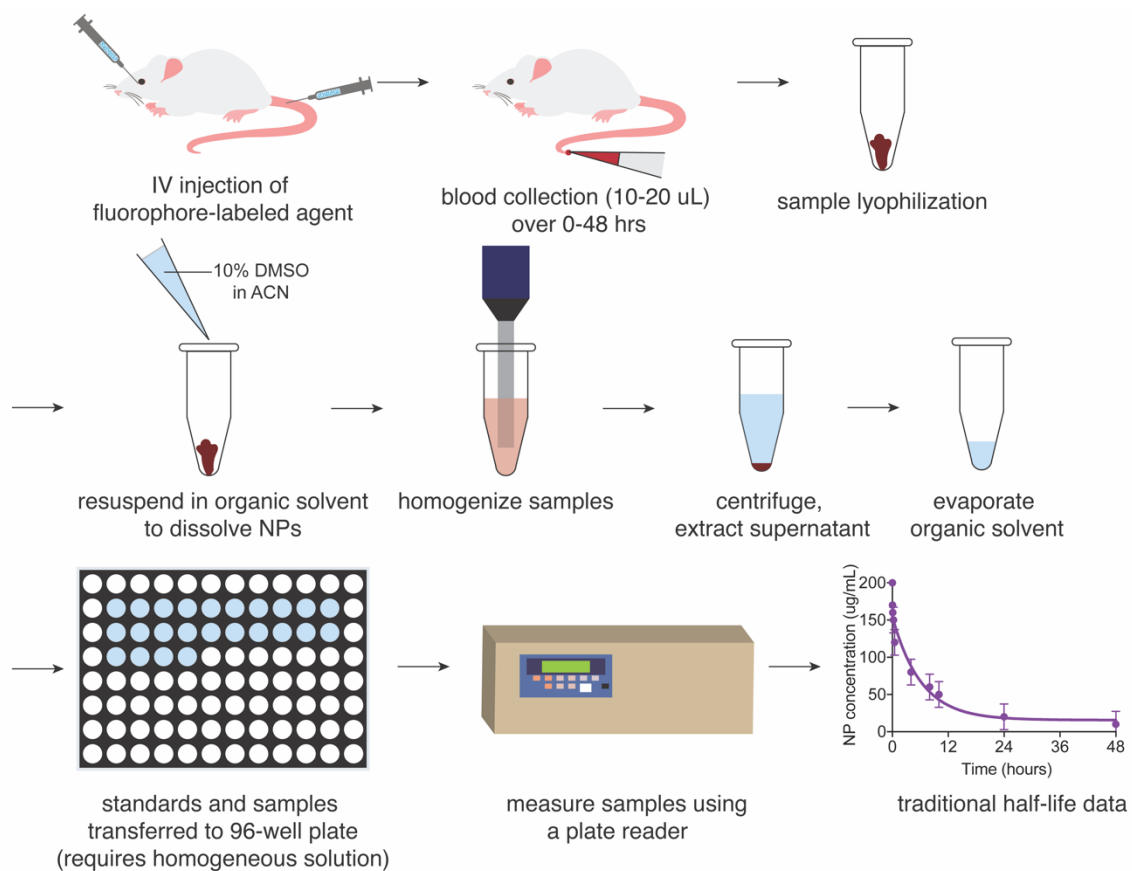

**Fig. S1. Schematic illustrating the workflow for half-life measurements and end-point analyses using a traditional microplate method.**

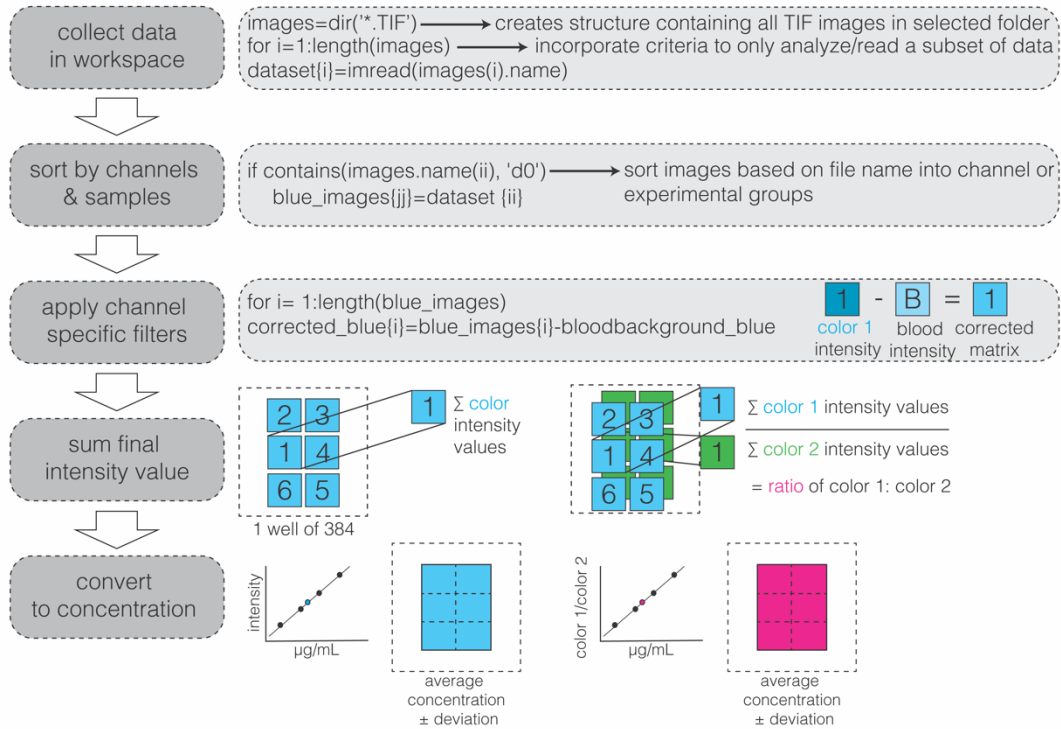

**Fig. S2. MATLAB program workflow for quantitative image analysis.**

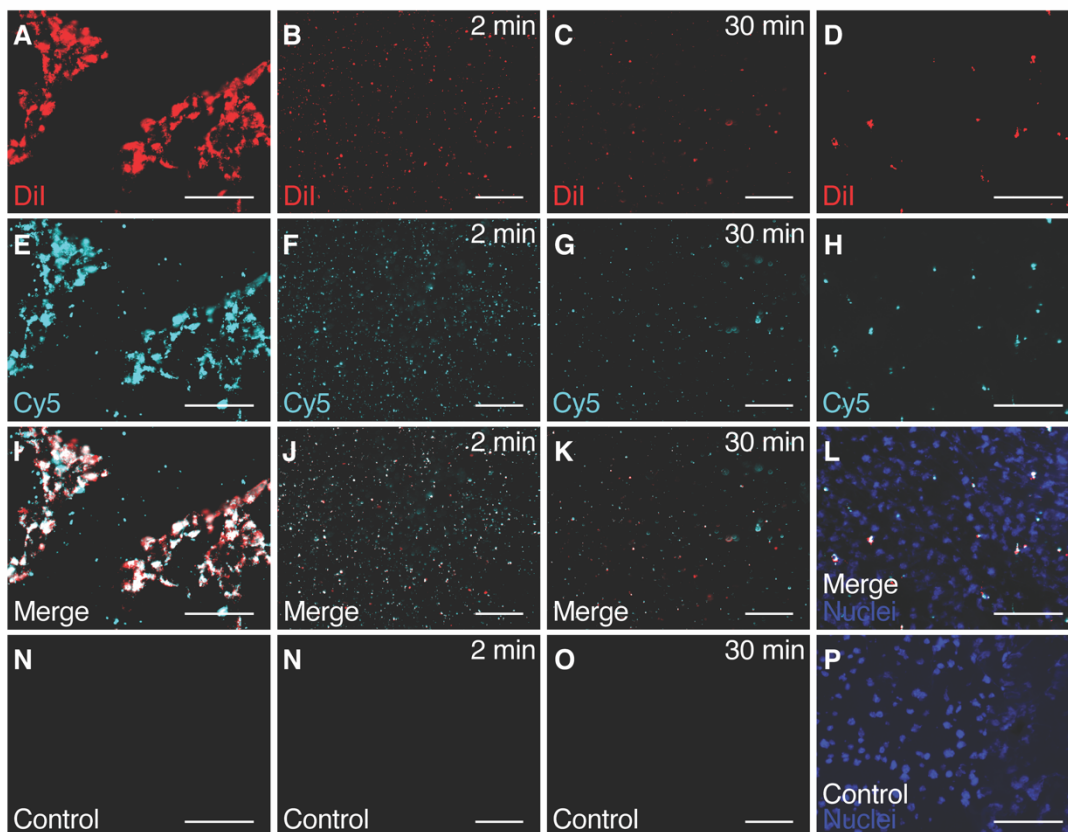

**Fig. S3. Dual-color NPs demonstrate colocalization of polymeric vehicle and dye cargo.** Representative fluorescence images of dual color NPs PLGA-Cy5 loaded with Dil administered *in vitro* in HEK293 cells and IV *in vivo*. (A-D) Dil signal in (A) HEK293 cells 24 hours after treatment, (B) blood collected 2 minutes after IV NP administration, (C) blood collected 30 minutes after IV NP administration, (D) liver sections 48 hours after IV NP administration. (E-H) Cy5 signal in the samples described in (A-D). (I-L) Merged Dil, Cy5, and Nuclei (where applicable) signal in the samples described in (A-D). (M-P) Merged Dil and Cy5 signal in control samples. Scale bars, 100  $\mu\text{m}$ .

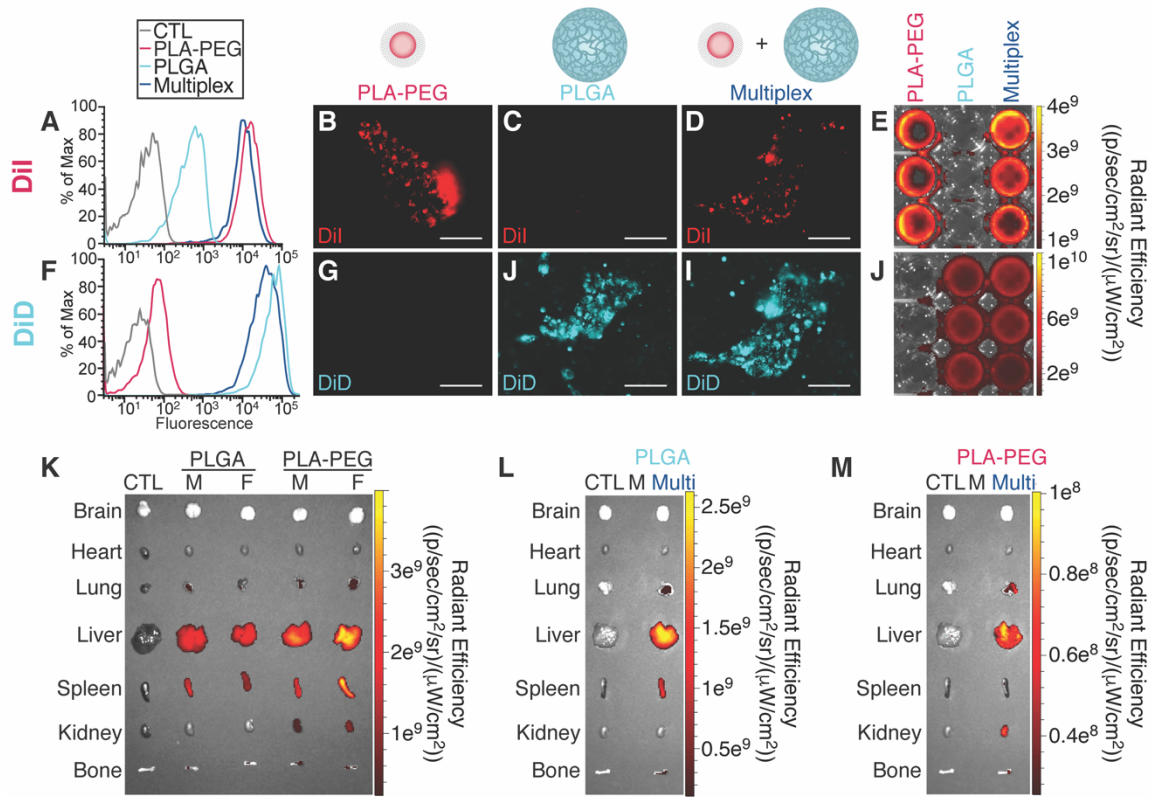

**Fig. S4. Quantitative fluorescent measurements demonstrate feasibility of multiplexing.** (A-J) Representative flow cytometry, microscopy, and IVIS data following treatment of HEK293 cells with DiI-loaded PLA-PEG, DiD-loaded PLGA, or combined DiI PLA-PEG and DiD PLGA NPs at 0.2 mg/mL. Panels (A-E) indicate signal obtained in the red channel (DiI signal). Panels (F-J) indicate signal obtained in the far red channel (DiD signal). Together, these data demonstrate that NP formulations encapsulating different fluorescent dyes can be distinguished from one another even when combined in the same experiment. (K-M) IVIS images of DiD or DiI NP-treated animals 48 hours after *in vivo* IV administration with untreated control animals. (K) DiD signal in the organs of male and female animals administered with DiD-loaded PLGA or PLA-PEG NPs. (L) DiD signal in the organs of a male animal administered with DiI-loaded PLA-PEG NPs and DiD-loaded PLGA NPs. (M) DiI signal in the organs of the animal in panel (L). Scale bars, 100  $\mu\text{m}$ .

**Table S1. Characterization data for dye-loaded PLA-PEG and PLGA NPs and the Anti-CD45 IgG1 antibody.**

| <b>Agent</b>                               | <b>Diameter (nm)</b> | <b>Polydispersity Index (PDI)</b> | <b>Zeta Potential (mV)</b> |
|--------------------------------------------|----------------------|-----------------------------------|----------------------------|
| PLA-PEG DiD                                | 173 ± 1              | 0.140                             | -24.0 ± 0.9                |
| PLA-PEG DiO                                | 184 ± 5              | 0.140                             | -19.2 ± 0.6                |
| PLA-PEG DiI                                | 183 ± 1              | 0.150                             | -23.8 ± 0.5                |
| PLGA DiD                                   | 273 ± 2              | 0.190                             | -17.2 ± 0.7                |
| PLGA DiO                                   | 262 ± 2              | 0.140                             | -20.2 ± 0.6                |
| PLGA-Cy5 DiI                               | 339 ± 2              | 0.180                             | -19.2 ± 0.5                |
| mouse-anti-human IgG1 antibody (anti-CD45) | ~10<br>(150-170 kDa) | -                                 | -                          |

**Table S2. NP concentration values calculated for each image (n=6) of each blood sample (n=3) per time point (n=10) following retro-orbital or tail-vein IV PLA-PEG NP administration.**

| Time               | NP concentration (µg/mL) |       |       |            |       |       |       |            |
|--------------------|--------------------------|-------|-------|------------|-------|-------|-------|------------|
|                    | RO M1                    | RO M2 | RO M3 | Average RO | TV M1 | TV M2 | TV M3 | Average TV |
| 2 min              | 119.5                    | 117.7 | 118.2 |            | 235.1 | 236.1 | 223.9 |            |
|                    | 129.6                    | 130.4 | 131.9 |            | 270.7 | 255.4 | 246.4 |            |
|                    | 132.3                    | 130.5 | 122.0 |            | 254.0 | 251.7 | 231.4 |            |
|                    | 114.7                    | 115.7 | 108.3 |            | 223.5 | 226.1 | 204.6 |            |
|                    | 152.0                    | 136.4 | 128.5 |            | 226.8 | 241.0 | 220.7 |            |
|                    | 151.0                    | 134.5 | 132.1 |            | 238.6 | 244.4 | 234.0 |            |
| average            | 133.2                    | 127.5 | 123.5 | 128.1      | 241.4 | 242.4 | 226.8 | 236.9      |
| standard deviation | 15.6                     | 8.7   | 9.3   | 4.9        | 17.9  | 10.6  | 14.1  | 8.7        |
| 15 min             | 208.5                    | 213.7 | 203.6 |            | 186.8 | 245.0 | 216.9 |            |
|                    | 224.0                    | 225.7 | 216.9 |            | 228.0 | 260.2 | 223.4 |            |
|                    | 219.3                    | 227.8 | 218.9 |            | 207.8 | 252.7 | 213.5 |            |
|                    | 205.8                    | 204.0 | 196.9 |            | 186.6 | 237.3 | 201.0 |            |
|                    | 240.6                    | 238.0 | 224.2 |            | 197.6 | 251.9 | 222.6 |            |
|                    | 220.5                    | 238.5 | 227.6 |            | 204.5 | 250.6 | 237.3 |            |
| average            | 219.8                    | 224.6 | 214.7 | 219.7      | 201.9 | 249.6 | 219.1 | 223.5      |
| standard deviation | 12.4                     | 13.6  | 12.0  | 5.0        | 15.5  | 7.7   | 12.0  | 24.2       |
| 30 min             | 257.4                    | 236.9 | 260.2 |            | 230.5 | 192.9 | 232.9 |            |
|                    | 270.3                    | 273.0 | 288.4 |            | 259.4 | 210.3 | 274.3 |            |
|                    | 273.9                    | 255.1 | 287.3 |            | 256.8 | 204.7 | 250.2 |            |
|                    | 243.1                    | 223.7 | 260.3 |            | 222.2 | 185.0 | 208.4 |            |
|                    | 266.6                    | 242.0 | 282.3 |            | 243.3 | 200.6 | 222.9 |            |
|                    | 273.3                    | 245.1 | 280.0 |            | 244.4 | 198.9 | 248.9 |            |
| average            | 264.1                    | 246.0 | 276.4 | 262.2      | 242.8 | 198.7 | 239.6 | 227.0      |
| standard deviation | 11.9                     | 16.8  | 12.9  | 15.3       | 14.5  | 8.9   | 23.2  | 24.6       |
| 1 hr               | 205.8                    | 176.1 | 155.4 |            | 191.1 | 132.5 | 178.1 |            |
|                    | 219.2                    | 198.3 | 167.1 |            | 203.3 | 147.8 | 204.9 |            |
|                    | 211.5                    | 180.3 | 165.6 |            | 198.5 | 146.6 | 195.0 |            |
|                    | 197.8                    | 160.7 | 153.6 |            | 184.3 | 130.9 | 171.5 |            |
|                    | 224.6                    | 169.6 | 161.6 |            | 199.8 | 138.6 | 184.0 |            |
|                    | 228.9                    | 182.5 | 163.8 |            | 203.4 | 140.5 | 188.7 |            |
| average            | 214.6                    | 177.9 | 161.2 | 184.6      | 196.7 | 139.5 | 187.1 | 174.4      |
| standard deviation | 11.8                     | 12.7  | 5.5   | 27.3       | 7.6   | 7.0   | 12.0  | 30.6       |
| 2 hr               | 135.1                    | 149.8 | 149.3 |            | 152.4 | 118.1 | 124.4 |            |
|                    | 147.5                    | 152.3 | 151.7 |            | 152.4 | 128.2 | 139.4 |            |
|                    | 146.6                    | 152.1 | 148.6 |            | 152.4 | 130.4 | 128.9 |            |
|                    | 131.7                    | 148.0 | 135.2 |            | 152.4 | 121.7 | 120.0 |            |
|                    | 122.5                    | 140.1 | 125.5 |            | 152.4 | 113.5 | 113.1 |            |

|                    |       |       |       |       |       |       |       |       |
|--------------------|-------|-------|-------|-------|-------|-------|-------|-------|
|                    | 128.5 | 144.2 | 136.2 |       | 152.4 | 111.4 | 110.5 |       |
| average            | 135.3 | 147.8 | 141.1 | 141.4 | 152.4 | 120.5 | 122.7 | 131.9 |
| standard deviation | 10.0  | 4.8   | 10.4  | 6.2   | 0.0   | 7.7   | 10.7  | 17.8  |
| 4 hr               | 99.9  | 126.1 | 96.5  |       | 109.7 | 95.8  | 125.3 |       |
|                    | 115.5 | 142.4 | 116.2 |       | 122.2 | 122.0 | 141.3 |       |
|                    | 99.9  | 129.1 | 115.9 |       | 119.2 | 113.8 | 137.1 |       |
|                    | 93.8  | 118.0 | 99.4  |       | 107.8 | 66.1  | 120.3 |       |
|                    | 94.7  | 112.3 | 88.9  |       | 101.2 | 62.0  | 112.4 |       |
|                    | 109.5 | 115.7 | 89.4  |       | 103.3 | 85.1  | 113.0 |       |
| average            | 102.2 | 123.9 | 101.1 | 109.1 | 110.6 | 90.8  | 124.9 | 108.8 |
| standard deviation | 8.6   | 11.0  | 12.3  | 12.9  | 8.5   | 24.5  | 12.2  | 17.1  |
| 8 hr               | 118.7 | 91.6  | 87.6  |       | 105.6 | 82.5  | 97.3  |       |
|                    | 135.0 | 102.6 | 97.9  |       | 114.2 | 91.9  | 119.4 |       |
|                    | 123.7 | 100.2 | 95.8  |       | 110.8 | 93.0  | 117.0 |       |
|                    | 113.6 | 91.5  | 88.7  |       | 104.2 | 85.2  | 91.3  |       |
|                    | 104.3 | 84.3  | 80.6  |       | 102.1 | 80.4  | 79.5  |       |
|                    | 105.6 | 90.2  | 84.3  |       | 107.5 | 81.1  | 89.8  |       |
| average            | 116.8 | 93.4  | 89.1  | 99.8  | 107.4 | 85.7  | 99.1  | 97.4  |
| standard deviation | 11.6  | 6.8   | 6.6   | 14.9  | 4.4   | 5.5   | 15.9  | 11.0  |
| 10 hr              | 54.2  | 54.9  | 45.2  |       | 69.0  | 77.5  | 91.9  |       |
|                    | 65.8  | 63.7  | 55.0  |       | 80.4  | 87.0  | 45.7  |       |
|                    | 65.9  | 62.9  | 53.5  |       | 72.4  | 85.9  | 112.2 |       |
|                    | 56.3  | 56.0  | 44.7  |       | 66.0  | 78.8  | 99.3  |       |
|                    | 50.4  | 52.3  | 40.3  |       | 61.4  | 73.0  | 85.9  |       |
|                    | 52.3  | 53.2  | 43.3  |       | 64.7  | 75.6  | 92.6  |       |
| average            | 57.5  | 57.2  | 47.0  | 53.9  | 69.0  | 79.6  | 87.9  | 78.8  |
| standard deviation | 6.8   | 4.9   | 5.9   | 6.0   | 6.8   | 5.6   | 22.5  | 9.5   |
| 24 hr              | 41.0  | 41.7  | 45.8  |       | 33.0  | 46.1  | 43.7  |       |
|                    | 49.8  | 49.4  | 54.9  |       | 36.4  | 51.5  | 51.0  |       |
|                    | 45.0  | 48.2  | 49.6  |       | 34.2  | 51.2  | 47.3  |       |
|                    | 39.8  | 41.9  | 45.0  |       | 32.4  | 46.4  | 43.2  |       |
|                    | 37.1  | 37.3  | 42.0  |       | 31.7  | 43.1  | 39.4  |       |
|                    | 38.3  | 39.1  | 42.6  |       | 33.4  | 45.2  | 40.1  |       |
| average            | 41.8  | 43.0  | 46.7  | 43.8  | 33.5  | 47.3  | 44.1  | 41.6  |
| standard deviation | 4.8   | 4.9   | 4.9   | 2.5   | 1.7   | 3.4   | 4.4   | 7.2   |
| 48 hr              | 17.9  | 16.0  | 15.5  |       | 12.4  | 19.1  | 15.8  |       |
|                    | 21.4  | 19.0  | 18.2  |       | 13.9  | 22.2  | 19.0  |       |
|                    | 19.8  | 18.4  | 17.8  |       | 13.2  | 22.2  | 18.7  |       |
|                    | 17.7  | 15.8  | 15.6  |       | 12.1  | 19.2  | 15.9  |       |
|                    | 16.4  | 14.6  | 14.3  |       | 11.5  | 17.4  | 14.6  |       |
|                    | 16.4  | 15.0  | 14.6  |       | 11.6  | 18.4  | 14.5  |       |



|                    |      |      |      |      |      |      |      |      |
|--------------------|------|------|------|------|------|------|------|------|
| average            | 18.2 | 16.5 | 16.0 | 16.9 | 12.5 | 19.7 | 16.4 | 16.2 |
| standard deviation | 2.0  | 1.8  | 1.6  | 1.2  | 0.9  | 2.0  | 2.0  | 3.6  |
